# Supplementary material for: Comparisons of Spatial and Temporal Variations in PM2.5-Bound Trace Elements in Urban and Rural Areas of South Korea, and Associated Potential Health Risks
Source: MDPI journal article supplement (doi:10.3390/atmos14040753), 2023-04-21
Supplement: s1 [file s1]

Archive with 1 entries (1 files):
- atmosphere-2352278-supplementary.pdf
