# Supplementary material for: Comparisons of Spatial and Temporal Variations in PM2.5-Bound Trace Elements in Urban and Rural Areas of South Korea, and Associated Potential Health Risks
Source: MDPI journal article supplement (doi:10.3390/atmos14040753), 2023-04-21
Supplement: s1 [file s1 › atmosphere-2352278-supplementary.pdf]

---

## Supplementary Materials:

# Comparisons of Spatial and Temporal Variations in PM<sub>2.5</sub>-Bound Trace Elements in Urban and Rural Areas of South Korea, and Associated Potential Health Risks

Jayant Nirmalkar <sup>1</sup>, Kwangyul Lee <sup>2</sup>, Junyoung Ahn <sup>3</sup>, Jiye Lee <sup>4</sup> and Mijung Song <sup>1,5,\*</sup>

<sup>1</sup> Department of Earth and Environmental Sciences, Jeonbuk National University, Jeonju, 54896, Republic of Korea; jayant@jbnu.ac.kr

<sup>2</sup> Division of Climate and Air Quality Research, National Institute of Environmental Research, Chungcheong Region Air Quality Research Center, Seosan 32010, Republic of Korea

<sup>3</sup> Division of Climate and Air Quality Research, National Institute of Environmental Research, Incheon 22689, Republic of Korea

<sup>4</sup> Department of Environmental Science and Engineering, Ewha Womans University, Seoul, 03760, Republic of Korea

<sup>5</sup> Department of Environment and Energy, Jeonbuk National University, Jeonju, 54896, Republic of Korea

\* Correspondence: mijung.song@jbnu.ac.kr

### Text S1. Temporal variation of PM<sub>2.5</sub>

The daily average concentrations of PM<sub>2.5</sub>, S, K, soil, and other elements throughout the study period are shown in Figure S2. The inverse relationship between PM<sub>2.5</sub> levels and wind speed velocity observed at both locations was attributed to increased dispersion caused by high wind velocities. Additionally, during the study period, three pollution events with PM<sub>2.5</sub> concentrations greater than 35 µg/m<sup>3</sup> were measured in Seoul and Seosan (Figure S2). The S, K, and soil increased similarly during days with high PM<sub>2.5</sub> concentrations, suggesting that these components may have impacted the increased concentrations during pollution events.

The PM<sub>2.5</sub> concentrations at both study sites were comparable to those from a previous study of South Korea, but lower than those from a previous study of China (Table S3). S was found to be a major component in both Seoul and Seosan, and this is consistent with the findings of studies of other locations in China, including Shandong, Beijing, Guzheng, and Chifeng (Table S3). For crustal elements (Si, Ca, Fe, and Ti), the concentrations in Beijing have been recorded several times higher than in Seoul and Seosan. Furthermore, the concentrations of Se and Br were also several times higher in Beijing than at the sites in this study (Table S3). It is known that these elements, along with S, are emitted during coal combustion.

### Text S2. Estimation of the origins of the elements

To estimate the origins of the elements in PM<sub>2.5</sub>, PCA, which explains statistical variance in a dataset using the fewest possible meaningful components, was applied using trace element concentrations as input data. This procedure replaces several intercorrelated variables with more minor independent variables via orthogonal transformations. The values of the factor loadings for each element assessed for each primary rotational component were maximized/minimized using a varimax-normalized rotation. Factor loadings above 1 are often regarded as excellent.

During the study period, potential trace element sources and their transport pathways to the study locations were tracked using the HYSPLIT (Hybrid Single-Particle Lagrangian Integrated Trajectory) backward air-mass trajectory model. The repository of 1°-resolution meteorological data from the Global Data Assimilation System of the National Center for Environmental Prediction was used to compute the trajectories, which were calculated using the Real-Time Environmental Applications and Display System's online interface (<https://ready.arl.noaa.gov/HYSPLIT.php>) [1,2]. When computing the

---

five-day backward trajectories, we used a height of 500 m AGL (above ground level) for each sampling location to avoid the impacts of topography on air-mass movement.

## Supplementary Tables

**Table S1.** Method detection limits ( $\text{ng m}^{-3}$ ) of trace elements analyzed using Xact 605i.

| Element | Atomic Number | Detection Limits |
|---------|---------------|------------------|
| Al      | 13            | 100              |
| Si      | 14            | 17.8             |
| P       | 15            | 5.2              |
| S       | 16            | 3.16             |
| Cl      | 17            | 1.73             |
| K       | 19            | 1.17             |
| Ca      | 20            | 0.3              |
| Ti      | 22            | 0.16             |
| V       | 23            | 0.12             |
| Cr      | 24            | 0.12             |
| Mn      | 25            | 0.14             |
| Fe      | 26            | 0.17             |
| Co      | 27            | 0.14             |
| Ni      | 28            | 0.1              |
| Cu      | 29            | 0.079            |
| Zn      | 30            | 0.067            |
| As      | 33            | 0.063            |
| Se      | 34            | 0.081            |
| Br      | 35            | 0.1              |
| Ag      | 47            | 1.9              |
| Cd      | 48            | 2.5              |
| In      | 49            | 3.1              |
| Sn      | 50            | 4.1              |
| Sb      | 51            | 5.2              |
| Ba      | 56            | 0.39             |
| Hg      | 80            | 0.12             |
| Tl      | 81            | 0.12             |
| Pb      | 82            | 0.13             |

**Table S2.** Values to be used as guidelines for estimating the health risks posed by PM<sub>2.5</sub>-bound trace elements via various pathways.

| Parameter                           | Symbol | Unit                                                            | Value                                                                                          | Reference                                                                                                                                                                                                                                                                                    |
|-------------------------------------|--------|-----------------------------------------------------------------|------------------------------------------------------------------------------------------------|----------------------------------------------------------------------------------------------------------------------------------------------------------------------------------------------------------------------------------------------------------------------------------------------|
| Elemental concentrations            | C      | $\mu\text{g m}^{-3}$                                            |                                                                                                | This study                                                                                                                                                                                                                                                                                   |
| Ingestion rate                      | IngR   | $\text{mg day}^{-1}$                                            | Children (200), adults (100)                                                                   | USEPA Part A Volume 1, 1989                                                                                                                                                                                                                                                                  |
| Exposure duration                   | ED     | Years                                                           | Children (6), adults (24)                                                                      | USEPA Part E, 2004                                                                                                                                                                                                                                                                           |
| Average body weight                 | BW     | kg                                                              | Children (15), adults (70)                                                                     | USEPA Part E, 2004                                                                                                                                                                                                                                                                           |
| Exposure time                       | ET     | $\text{hour day}^{-1}$                                          | 12                                                                                             | This study                                                                                                                                                                                                                                                                                   |
| Exposure frequency                  | EF     | $\text{days year}^{-1}$                                         | 180                                                                                            | USEPA Part E, 2004                                                                                                                                                                                                                                                                           |
| Conversion factor                   | CF     | $\text{kg mg}^{-1}$                                             | $10^{-6}$                                                                                      | USEPA Part E, 2004                                                                                                                                                                                                                                                                           |
| Skin adherence factor               | AF     | $\text{mg cm}^{-2}$                                             | Adults and children (0.2)                                                                      | USEPA Part A, E, F. 2011                                                                                                                                                                                                                                                                     |
| Averaging time                      | AT     | days                                                            | Non-carcinogens (AT = ED × 365),<br>Carcinogens (AT = 70 × 365)                                | USEPA Part E, 2004                                                                                                                                                                                                                                                                           |
| Surface area                        | SA     | $\text{cm}^2$                                                   | Adults (3300), children (2800)                                                                 | USEPA Part A, E, F. 2011                                                                                                                                                                                                                                                                     |
| Dermal absorption factor            | ABS    | $(\text{hours day}^{-1})$                                       | 0.03 for As, 0.1 for Pb and remain 0.01 for remaining elements                                 | USEPA Part E. 2011                                                                                                                                                                                                                                                                           |
| Average time                        | ATn    | Non-carcinogenic (Year × hours),<br>Carcinogenic (days × hours) | Non-carcinogens (ED × 365 days × 24 hours/day)<br>Carcinogens (70 year × 365 days/year × 24 h) | USEPA Part E, 2004 [3]                                                                                                                                                                                                                                                                       |
| Inhalation unit risk                | IUR    | $(\mu\text{g m}^{-3})^{-1}$                                     | Cr (0.012), Ni (0.0043), As (0.00024) Pb (0.000012),                                           | User's Guide and Background Technical Document for US EPA Region 9's Preliminary Remediation Goals (PRG) Table.<br><a href="http://www.epa.gov/reg3hwm/risk/human/rb-concentrationtable/usersguide.htm">http://www.epa.gov/reg3hwm/risk/human/rb-concentrationtable/usersguide.htm</a> . [4] |
| Inhalation reference concentrations | RfCi   | $(\text{mg m}^{-3})$                                            | Cr (1.00E-04)<br>Mn, Ni (5.00E-05)<br>Ni (5.00E-05)<br>As, (1.50E-05)<br>Cr (5.00E-01)         | USEPA Part A, E, F. 2011, [5]                                                                                                                                                                                                                                                                |
| Oral slope factor                   | SFo    | $((\text{mg kg}^{-1} \text{ day}^{-1})^{-1})$                   | As (1.50E+00)<br>Pb (2.80E-01)                                                                 | USEPA Part A, E, F. 2011, [5]                                                                                                                                                                                                                                                                |
| Gastrointestinal absorption factor  | GIABS  |                                                                 | Cr (0.025)<br>Ni (0.04)                                                                        | USEPA Part A, E, F. 2011, [5]                                                                                                                                                                                                                                                                |
| Inhalation rate                     | InhR   |                                                                 | Cu, Pb, Zn, Mn, As (1)<br>Adults (15), children (7.5)                                          |                                                                                                                                                                                                                                                                                              |

Note: The USEPA citations in Table S2 were obtained from the USEPA website: <http://www.epa.gov>.

**Table S3.** Comparison of PM<sub>2.5</sub> (µg/m<sup>3</sup>) and trace element (ng m<sup>-3</sup>) concentrations at the study sites with those from other studies.

| Element and PM <sub>2.5</sub>  | PM <sub>2.5</sub> | Si    | S    | K    | Ca    | Ti    | V   | Cr   | Mn   | Fe   | Ni  | Cu   | Zn   | As  | Se   | Br  | Ba  | Pb   | References |
|--------------------------------|-------------------|-------|------|------|-------|-------|-----|------|------|------|-----|------|------|-----|------|-----|-----|------|------------|
| Seoul, South Kora              | 23                | 237.5 | 1447 | 251  | 83.3  | 10.7  | 0.6 | 1.2  | 13.1 | 185  | 0.5 | 4.4  | 49.2 | 4.6 | 1    | 7.3 | 1.7 | 21   | This study |
| Seosan, South Korea            | 31.2              | 306.1 | 1265 | 295  | 101.1 | 11.5  | 0.5 | 1.2  | 15.8 | 210  | 0.7 | 4.1  | 50.6 | 3.8 | 1.4  | 8.8 |     | 21   | This study |
| Chifeng, North-east China      | 36.2              |       |      | 1012 | 454.3 | 26.9  | 1.8 | 2.4  | 16.6 | 390  | 1.2 | 16.5 | 83.7 | 4.6 |      |     | 24  | 51   | [6]        |
| Gucheng, China                 | 149.86            |       |      | 255  | 87.51 | 24.77 | 0.5 | 13.7 | 18.8 | 204  | 11  | 6.58 | 36.5 | 0   | 5.06 |     | 30  | 25.8 | [7]        |
| Shandong Province, China       | 133.33            | 2050  | 6270 | 5370 | 1160  | 80    | 17  | 20   | 90   | 1300 | 9.1 | 30   | 700  | 20  | 20   | 0   | 70  | 0    | [8]        |
| Seoul Metropolitan Area, Korea | 25.2              | 481   |      |      |       | 1380  | 8.2 | 15.8 | 22.3 | 482  | 9.5 | 25.9 | 123  | 3   | 17.1 |     | 22  | 20.1 | [9]        |
| Shanghai (Baoshan), China      | 84                |       |      |      |       | 61    | 17  | 58   | 113  | 1187 | 20  | 54   | 681  | 32  | 4.5  |     | 15  | 149  | [10]       |
| Beijing China                  | 122.1             | 2180  | 5100 | 2500 | 1340  | 90    |     |      |      | 1380 |     | 50   | 550  | 70  | 120  | 150 |     | 210  | [11]       |

**Table S4.** One-way ANOVA with Tukey's test and paired *t*-tests of daily mean PM<sub>2.5</sub> and chemical species concentrations in Seoul and Seosan.

|                   | One-way ANOVA with Tukey's test | Paired <i>t</i> -test |
|-------------------|---------------------------------|-----------------------|
| PM <sub>2.5</sub> | 0.01                            | 0.00                  |
| Si                | 0.53                            | 0.09                  |
| S                 | 0.27                            | 0.01                  |
| K                 | 0.10                            | 0.00                  |
| Ca                | 0.53                            | 0.01                  |
| Ti                | 0.76                            | 0.37                  |
| V                 | 0.31                            | 0.06                  |
| Cr                | 0.88                            | 0.79                  |
| Mn                | 0.26                            | 0.21                  |
| Fe                | 0.45                            | 0.05                  |
| Ni                | 0.09                            | 0.00                  |
| Cu                | 0.60                            | 0.52                  |
| Zn                | 0.83                            | 0.83                  |
| As                | 0.08                            | 0.05                  |
| Se                | 0.11                            | 0.00                  |
| Br                | 0.12                            | 0.01                  |
| Ba                | NA                              | NA                    |
| Pb                | 0.99                            | 0.99                  |

**Table S5.** One-way ANOVA with Tukey's test and paired t-tests of health and exposure associated with PM<sub>2.5</sub>-bound trace elements in Seoul and Seosan.

|                                         | One-way ANOVA with Tukey's test | Paired t-test |
|-----------------------------------------|---------------------------------|---------------|
| Exposure through ingestion in adults    | 0.00                            | 0.12          |
| Exposure through ingestion in children  | 0.16                            | 0.12          |
| Exposure through dermal in adults       | 0.92                            | 0.86          |
| Exposure through dermal in children     | 0.92                            | 0.86          |
| Exposure through inhalation in adults   | 0.28                            | 0.22          |
| Exposure through inhalation in children | 0.28                            | 0.22          |
| Adult hazard index                      | 0.78                            | 0.63          |
| Child hazard index                      | 0.62                            | 0.44          |

## Supplementary Figures

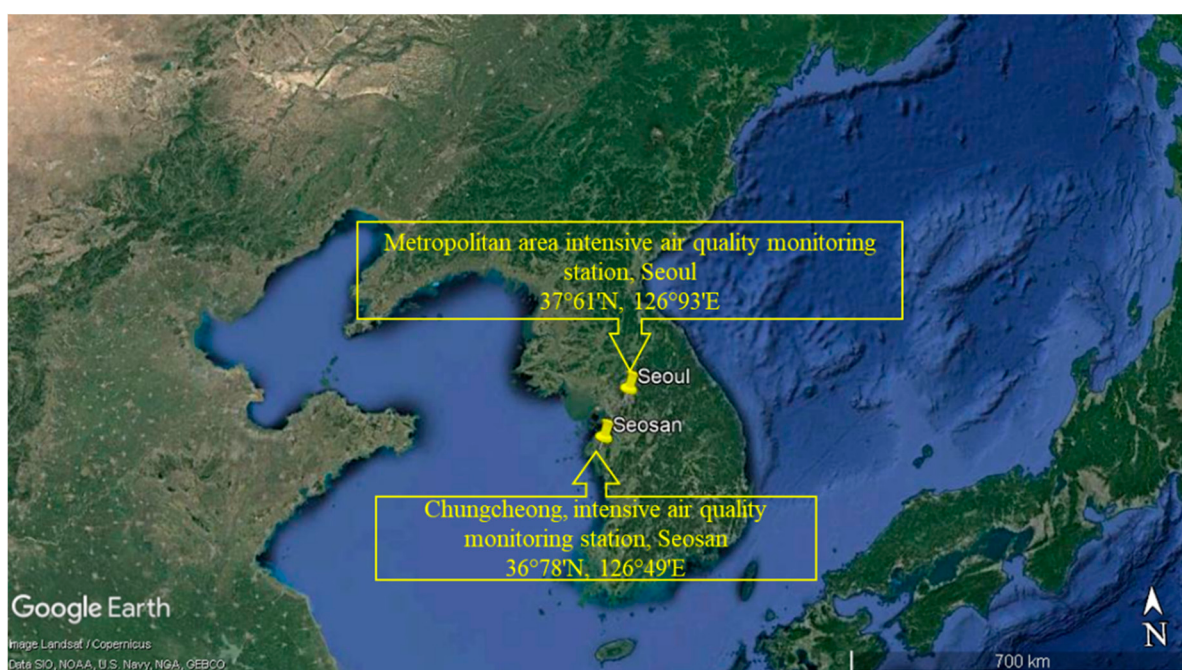

**Figure S1.** Study sites in South Korea.

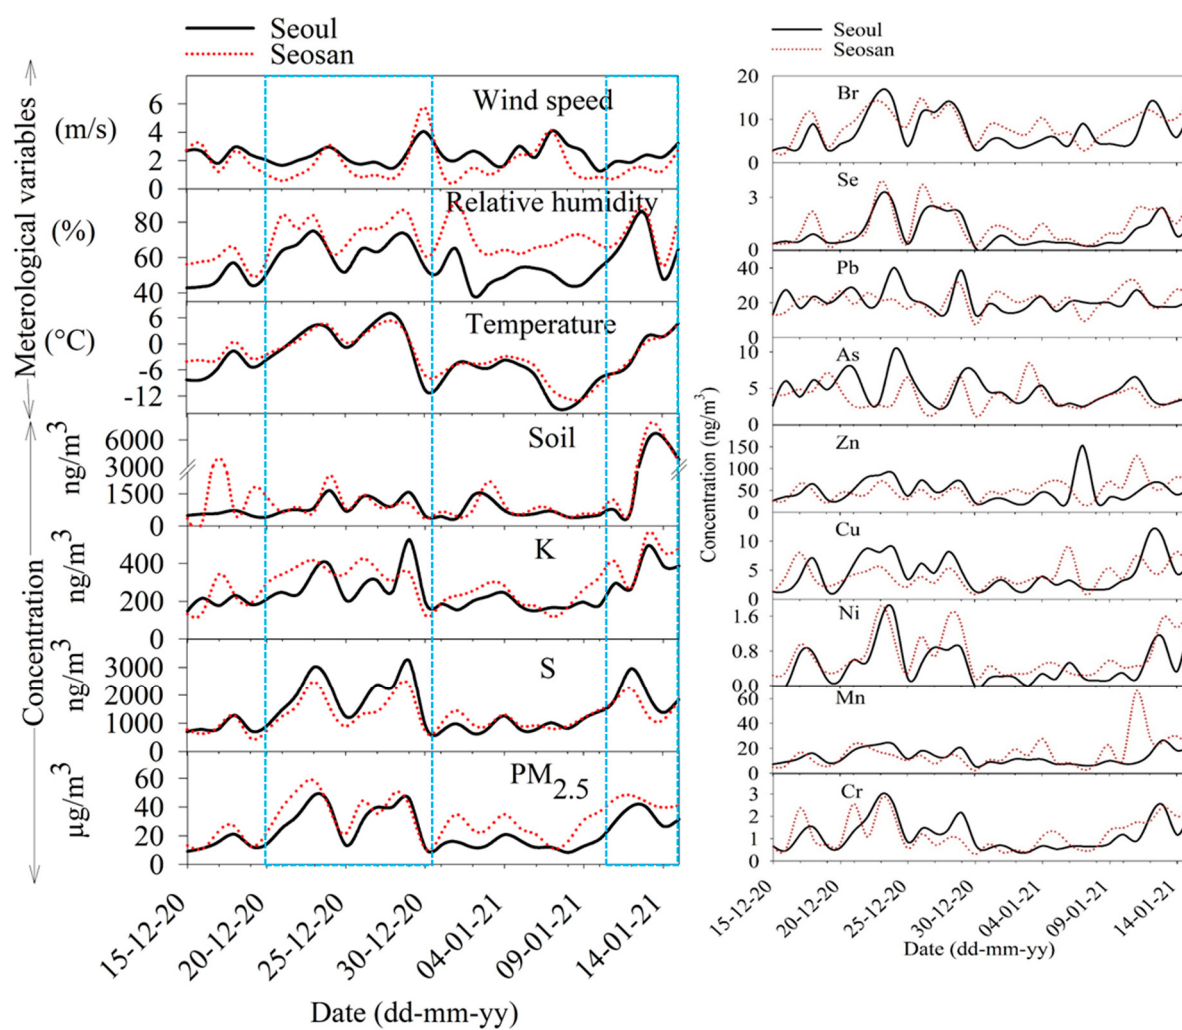

**Figure S2.** Daily variation of minor element in Seoul and Seosan during the winter period.

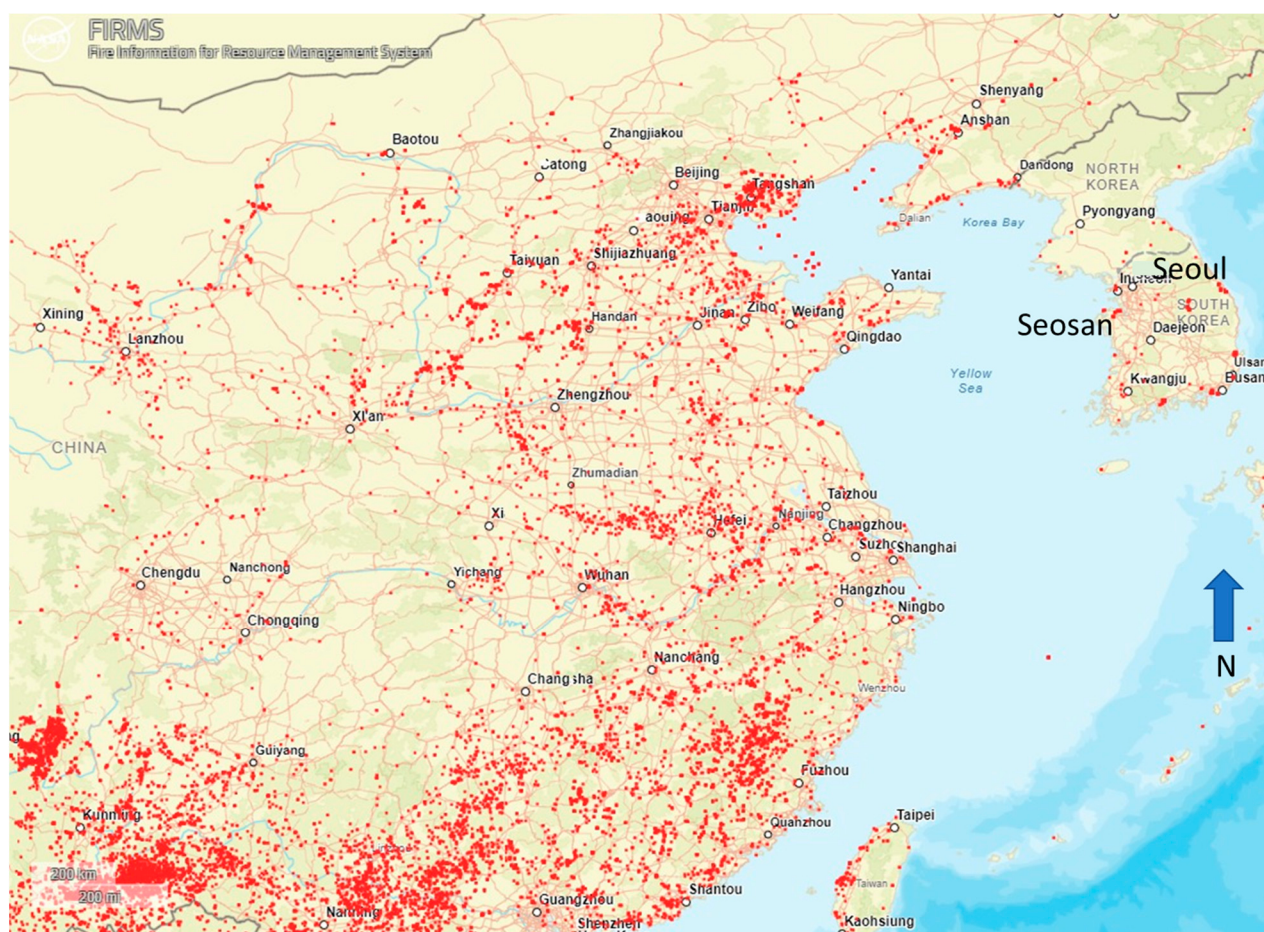

**Figure S3.** Fire spots in South Korea and neighboring countries during the sampling period.

Image retrieved from NASA's FIRMS VIIRS satellite (<https://firms.modaps.eosdis.nasa.gov/>) (accessed on 02 April 2023).

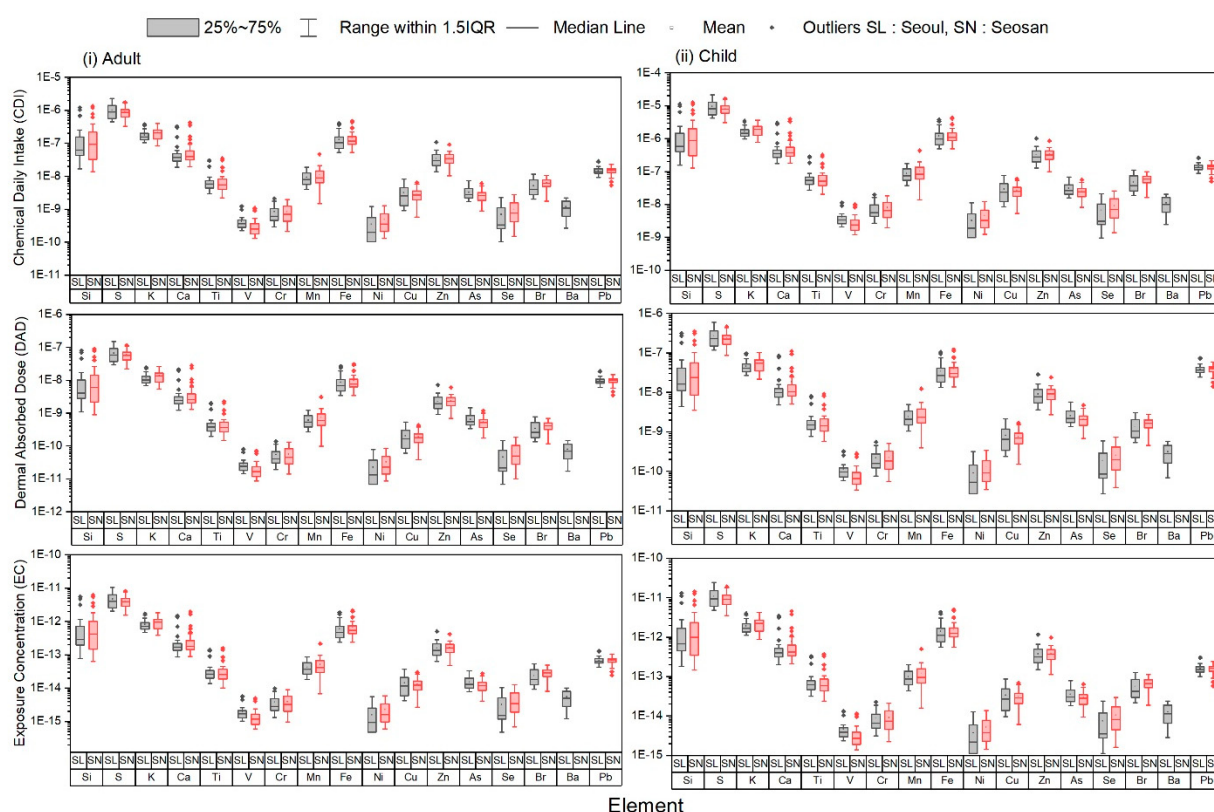

**Figure S4.** PM<sub>2.5</sub>-bound element exposure assessment over the Seoul (grey box) and Seosan (red box) locations in South Korea during the winter of 2020–2021. The values in this figure show TE exposure assessment based on daily average concentrations. Ingestion: chemical daily intake (CDI), dermal contact: dermal absorbed dose (DAD), and inhalation: exposure concentration (EC) were used to estimate exposure to elements in PM<sub>2.5</sub>.

## References

- Chen, F.; Zhang, X.; Zhu, X.; Zhang, H.; Gao, J.; Hopke, P.K. Chemical Characteristics of PM<sub>2.5</sub> during a 2016 Winter Haze Episode in Shijiazhuang, China. *Aerosol Air Qual. Res.* **2017**, *17*, 368–380, doi:10.4209/aaqr.2016.06.0274.
- Stein, A.F.; Draxler, R.R.; Rolph, G.D.; Stunder, B.J.B.; Cohen, M.D.; Ngan, F. NOAA's Hysplit Atmospheric Transport and Dispersion Modeling System. *Bull. Am. Meteorol. Soc.* **2015**, *96*, 2059–2077, doi:10.1175/BAMS-D-14-00110.1.
- Liu, X.; Zhai, Y.; Zhu, Y.; Liu, Y.; Chen, H.; Li, P.; Peng, C.; Xu, B.; Li, C.; Zeng, G. Mass Concentration and Health Risk Assessment of Heavy Metals in Size-Segregated Airborne Particulate Matter in Changsha. *Sci. Total Environ.* **2015**, *517*, 215–221, doi:10.1016/j.scitotenv.2015.02.066.
- Khanna, I.; Khare, M.; Gargava, P. Health Risks Associated with Heavy Metals in Fine Particulate Matter: A Case Study in Delhi City, India. *Int. Conf. Environ. Pollut. Public Heal. EPPH 2015* **2015**, 72–77, doi:10.4236/gep.2015.32012.
- Hu, X.; Zhang, Y.; Ding, Z.; Wang, T.; Lian, H.; Sun, Y.; Wu, J. Bioaccessibility and Health Risk of Arsenic and Heavy Metals (Cd, Co, Cr, Cu, Ni, Pb, Zn and Mn) in TSP and PM<sub>2.5</sub> in Nanjing, China. *Atmos. Environ.* **2012**, *57*, 146–152, doi:10.1016/j.atmosenv.2012.04.056.
- Hao, Y.; Meng, X.; Yu, X.; Lei, M.; Li, W.; Shi, F.; Yang, W.; Zhang, S.; Xie, S. Characteristics of Trace Elements in PM<sub>2.5</sub> and PM<sub>10</sub> of Chifeng, Northeast China: Insights into Spatiotemporal Variations and Sources. *Atmos. Res.* **2018**, *213*, 550–561, doi:10.1016/j.atmosres.2018.07.006.
- Liu, L.; Liu, Y.; Wen, W.; Liang, L.; Ma, X.; Jiao, J.; Guo, K. Source Identification of Trace Elements in PM<sub>2.5</sub> at a Rural Site in the North China Plain. *Atmosphere (Basel)*. **2020**, *11*, 1–15, doi:10.3390/atmos11020179.
- Zhang, J.; Zhou, X.; Wang, Z.; Yang, L.; Wang, J.; Wang, W. Trace Elements in PM<sub>2.5</sub> in Shandong Province: Source Identification and Health Risk Assessment. *Sci. Total Environ.* **2018**, *621*, 558–577, doi:10.1016/j.scitotenv.2017.11.292.
- Won, S.R.; Shim, I.K.; Kim, J.; Ah Ji, H.; Lee, Y.; Lee, J.; Ghim, Y.S. PM<sub>2.5</sub> and Trace Elements in Underground Shopping Districts in the Seoul Metropolitan Area, Korea. *Int. J. Environ. Res. Public Health* **2021**, *18*, 1–16, doi:10.3390/ijerph18010297.
- Chen, J.; Tan, M.; Li, Y.; Zheng, J.; Zhang, Y.; Shan, Z.; Zhang, G.; Li, Y. Characteristics of Trace Elements and Lead Isotope Ratios in PM<sub>2.5</sub> from Four Sites in Shanghai. *J. Hazard. Mater.* **2008**, *156*, 36–43, doi:10.1016/j.jhazmat.2007.11.122.
- Duan, L.; Song, J.; Xu, Y.; Li, X.; Zhang, Y. The Distribution, Enrichment and Source of Potential Harmful Elements in Surface Sediments of Bohai Bay, North China. *J. Hazard. Mater.* **2010**, *183*, 155–164, doi:10.1016/j.jhazmat.2010.07.005.

---

**Website references:**

- USEPA, D. (1989). Risk assessment guidance for superfund. Human Health Evaluation Manual Part A. URL: Available online: <https://www.epa.gov/risk/risk-assessment-guidance-superfund-rags-part> (accessed on 02 April 2023.)
- US EPA, 2011. Risk Assessment Guidance for Superfund. In: Part A: Human Health Evaluation Manual; Part E, Supplemental Guidance for Dermal Risk Assessment; Part F, Supplemental Guidance for Inhalation Risk Assessment, vol. I. URL: Available online: <https://www.epa.gov/risk/risk-assessment-guidance-superfund-rags-part-f> (Accessed on 02 April 2023.)
- USEPA (US Environmental Protection Agency), 2004. Risk Assessment Guidance for Superfund Volume I: Human Health Evaluation Manual (Part E). Available online: <http://www.epa.gov/oswer/riskassessment/ragse/pdf/introduction.pdf> URL: <https://www.epa.gov/risk/risk-assessment-guidance-superfund-rags-part-f> (accessed on 02 April 2023.)
- USEPA Risk Assessment Guidance for Superfund (RAGS): Part F. Available online: <https://www.epa.gov/risk/risk-assessment-guidance-superfund-rags-part-f> (accessed on 02 April 2023.)
- USEPA Risk Assessment Guidance for Superfund Volume I: Human Health Evaluation Manual (Part F, Supplemental Guidance for Inhalation Risk Assessment). Available online: [https://www.epa.gov/sites/production/files/2015-09/documents/partf\\_200901\\_final.pdf](https://www.epa.gov/sites/production/files/2015-09/documents/partf_200901_final.pdf) (accessed on 02 April 2023.)
- USEPA Risk Assessment Guidance for Superfund: Volume III - Part A, Process for Conducting Probabilistic Risk Assessment Available online: [https://www.epa.gov/sites/production/files/2015-09/documents/rags3adt\\_complete.pdf](https://www.epa.gov/sites/production/files/2015-09/documents/rags3adt_complete.pdf) (accessed on 02 April 2023.)
- USEPA Risk Assessment Guidance for Superfund Volume I: Human Health Evaluation Manual (Part E, Supplemental Guidance for Dermal Risk Assessment). Available online: [https://www.epa.gov/sites/production/files/2015-09/documents/part\\_e\\_final\\_revision\\_10-03-07.pdf](https://www.epa.gov/sites/production/files/2015-09/documents/part_e_final_revision_10-03-07.pdf) (accessed on 02 April 2023.)
- NOAA, READY (Real-time Environmental Applications and Display sYstem). Available online: <https://www.ready.noaa.gov/index.php> (accessed on 02 April 2023.)
